# Supplementary material
Source: PubMed Central journal article supplement (PMC10209965)
Supplement: freeneuropathol-02-31-3640-s001.pdf [file freeneuropathol-02-31-3640-s001.pdf]

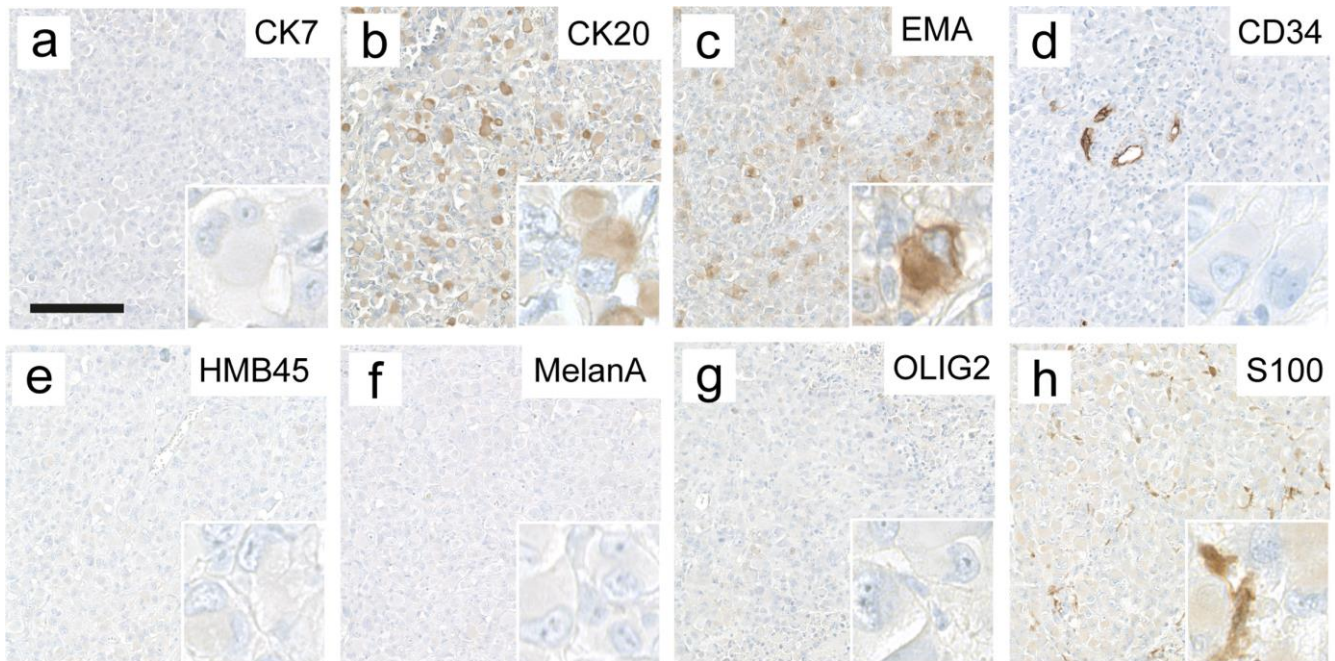

### Supplementary Figure 1: Additional immunohistochemical stainings

The tumor showed no expression of CK7 (a), but partial positivity for CK20 (b) and EMA (c). Further immunohistochemical stainings for CD34 (d), HMB45 (e), MelanA (f), and OLIG2 (g) were negative in the tumor cells. Expression of S100 was faint and disputable in the rhabdoid tumor cells, but distinctly visible in intermingled spindle-like cells (h). Scale bar is 150  $\mu$ m.
